# Supplementary material for: Anti-platelet Therapy Is Associated With Lower Risk of Dementia in Patients With Cerebral Small Vessel Disease
Source: Frontiers journal article supplement (doi:10.3389/fnagi.2022.788407), 2022-03-31
Supplement: Presentation_1.pdf [file Presentation_1.pdf]

# **Anti-platelet therapy is associated with lower risk of dementia of age-related cerebral small vessel disease**

Dong Pan<sup>†</sup>, M.D., Xiaoming Rong<sup>†</sup>, M.D. Ph.D., Honghong Li, M.D., Zhenhong Deng, M.D., Jia Wang, M.D., Xiaohuan Liu, M.D., Lei He, M.D. Ph.D., Yongteng Xu, M.D., Yamei Tang<sup>\*</sup>, M.D. Ph.D.

## **Supplementary Appendix**

|                                                                                                                                                           |           |
|-----------------------------------------------------------------------------------------------------------------------------------------------------------|-----------|
| <b>Supplementary Appendix S1: STROBE Statement—Checklist of items that should be included in reports of case-control studies.....</b>                     | <b>2</b>  |
| <b>Supplementary Appendix S2: The directed acyclic graph illustrating confounders selection.....</b>                                                      | <b>4</b>  |
| <b>Supplementary Appendix S3: The conditional logistic regression model for the estimates of anti-platelet therapy for overall dementia. ....</b>         | <b>5</b>  |
| Table S3.1 The model in the main analysis.....                                                                                                            | 5         |
| Table S3.2 The model in the sensitivity analysis. ....                                                                                                    | 6         |
| <b>Supplementary Appendix S4: The conditional logistic regression model for the estimates of clopidogrel use for overall dementia.....</b>                | <b>7</b>  |
| Table S4.1 The model in the main analysis.....                                                                                                            | 7         |
| Table S4.2 The model in the sensitivity analysis. ....                                                                                                    | 8         |
| <b>Supplementary Appendix S5: CSVD burden distribution between groups. ....</b>                                                                           | <b>9</b>  |
| <b>Supplementary Appendix S6: The multivariable conditional logistic regression analyses on the association between APT and subtypes of dementia.....</b> | <b>10</b> |
| <b>Supplementary Appendix S7: The detailed acquisition information of MRI sequences. ....</b>                                                             | <b>11</b> |

**Supplementary Appendix S1: STROBE Statement—Checklist of items that should be included in reports of case-control studies.**

|                              | Item No | Recommendation                                                                                                                                                                                    | Locations                |
|------------------------------|---------|---------------------------------------------------------------------------------------------------------------------------------------------------------------------------------------------------|--------------------------|
| Title and abstract           | 1       | (a) Indicate the study’s design with a commonly used term in the title or the abstract                                                                                                            | Page 4                   |
|                              |         | (b) Provide in the abstract an informative and balanced summary of what was done and what was found                                                                                               | Page 4                   |
|                              |         |                                                                                                                                                                                                   |                          |
| Introduction                 |         |                                                                                                                                                                                                   |                          |
| Background/rationale         | 2       | Explain the scientific background and rationale for the investigation being reported                                                                                                              | Page 6                   |
| Objectives                   | 3       | State specific objectives, including any prespecified hypotheses                                                                                                                                  | Page 7                   |
| Methods                      |         |                                                                                                                                                                                                   |                          |
| Study design                 | 4       | Present key elements of study design early in the paper                                                                                                                                           | Page 7                   |
| Setting                      | 5       | Describe the setting, locations, and relevant dates, including periods of recruitment, exposure, follow-up, and data collection                                                                   | Page 7                   |
| Participants                 | 6       | (a) Give the eligibility criteria, and the sources and methods of case ascertainment and control selection. Give the rationale for the choice of cases and controls                               | Page 8                   |
|                              |         | (b) For matched studies, give matching criteria and the number of controls per case                                                                                                               | Page 8-9                 |
| Variables                    | 7       | Clearly define all outcomes, exposures, predictors, potential confounders, and effect modifiers. Give diagnostic criteria, if applicable                                                          | Page 9                   |
| Data sources/<br>measurement | 8*      | For each variable of interest, give sources of data and details of methods of assessment (measurement). Describe comparability of assessment methods if there is more than one group              | Page 7<br>Page 9         |
|                              |         |                                                                                                                                                                                                   |                          |
| Bias                         | 9       | Describe any efforts to address potential sources of bias                                                                                                                                         | Line 149                 |
|                              |         |                                                                                                                                                                                                   | Line 156                 |
|                              |         |                                                                                                                                                                                                   | Line 175                 |
| Study size                   | 10      | Explain how the study size was arrived at                                                                                                                                                         | Line 144                 |
| Quantitative variables       | 11      | Explain how quantitative variables were handled in the analyses. If applicable, describe which groupings were chosen and why                                                                      | NA                       |
| Statistical methods          | 12      | (a) Describe all statistical methods, including those used to control for confounding                                                                                                             | Page 10-11               |
|                              |         | (b) Describe any methods used to examine subgroups and interactions                                                                                                                               |                          |
|                              |         | (c) Explain how missing data were addressed                                                                                                                                                       |                          |
|                              |         | (d) If applicable, explain how matching of cases and controls was addressed                                                                                                                       |                          |
|                              |         | (e) Describe any sensitivity analyses                                                                                                                                                             |                          |
| Results                      |         |                                                                                                                                                                                                   |                          |
| Participants                 | 13*     | (a) Report numbers of individuals at each stage of study—eg numbers potentially eligible, examined for eligibility, confirmed eligible, included in the study, completing follow-up, and analysed | Line 204-207,<br>Page 11 |
|                              |         | (b) Give reasons for non-participation at each stage                                                                                                                                              |                          |
|                              |         | (c) Consider use of a flow diagram                                                                                                                                                                | Figure 1                 |
| Descriptive data             | 14*     | (a) Give characteristics of study participants (eg demographic, clinical, social) and information on exposures and potential confounders                                                          | Table 1-2                |
|                              |         | (b) Indicate number of participants with missing data for each variable of interest                                                                                                               | Line 197                 |
| Outcome data                 | 15*     | Report numbers in each exposure category, or summary measures of exposure                                                                                                                         | Line 224                 |

|                          |    |                                                                                                                                                                                                              |                                     |
|--------------------------|----|--------------------------------------------------------------------------------------------------------------------------------------------------------------------------------------------------------------|-------------------------------------|
| Main results             | 16 | (a) Give unadjusted estimates and, if applicable, confounder-adjusted estimates and their precision (eg, 95% confidence interval). Make clear which confounders were adjusted for and why they were included | Table 3<br>Figure 2<br>Line 191-195 |
|                          |    | (b) Report category boundaries when continuous variables were categorized                                                                                                                                    | NA                                  |
|                          |    | (c) If relevant, consider translating estimates of relative risk into absolute risk for a meaningful time period                                                                                             | NA                                  |
| Other analyses           | 17 | Report other analyses done—eg analyses of subgroups and interactions, and sensitivity analyses                                                                                                               | Line 197-200                        |
| <b>Discussion</b>        |    |                                                                                                                                                                                                              |                                     |
| Key results              | 18 | Summarise key results with reference to study objectives                                                                                                                                                     | Page 13-16                          |
| Limitations              | 19 | Discuss limitations of the study, taking into account sources of potential bias or imprecision.<br>Discuss both direction and magnitude of any potential bias                                                |                                     |
| Interpretation           | 20 | Give a cautious overall interpretation of results considering objectives, limitations, multiplicity of analyses, results from similar studies, and other relevant evidence                                   |                                     |
| Generalisability         | 21 | Discuss the generalisability (external validity) of the study results                                                                                                                                        |                                     |
| <b>Other information</b> |    |                                                                                                                                                                                                              |                                     |
| Funding                  | 22 | Give the source of funding and the role of the funders for the present study and, if applicable, for the original study on which the present article is based                                                | Line 25-29                          |

\*Give information separately for cases and controls.

**Note:** An Explanation and Elaboration article discusses each checklist item and gives methodological background and published examples of transparent reporting. Information on the STROBE Initiative is available at <http://www.strobe-statement.org>.

### Supplementary Appendix S2: The directed acyclic graph illustrating confounders selection.

A Directed Acyclic Graph (DAG) was used to identify potential confounders and independent risk factors. White ovals represent potential confounders and independent risk factors that were included in a multivariable conditional logistic regression model for estimating the effect of APT on outcome. CSVD burden contains white matter hyperintensities, enlarged perivascular spaces, lacunes and brain atrophy.

Abbreviations: APT, anti-platelet therapy; CSVD, cerebral small vessel disease; CHD, coronary heart disease; AHT, anti-hypertension therapy.

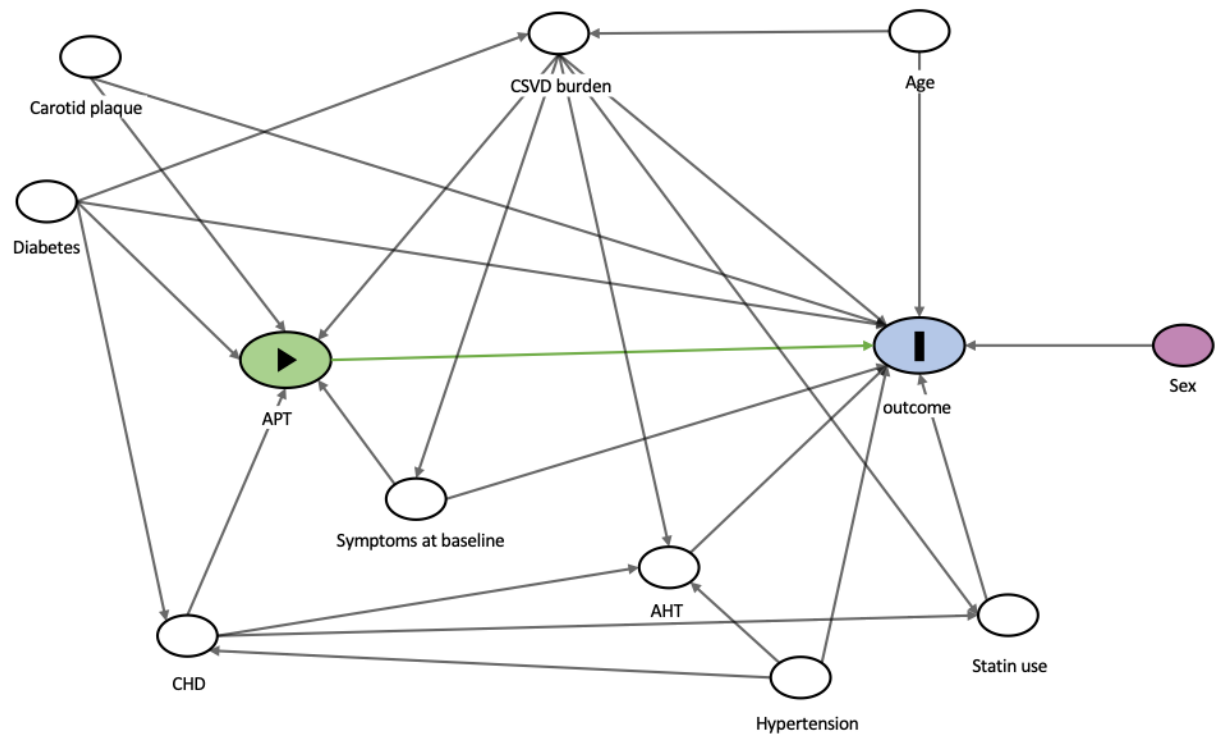

**Supplementary Appendix S3: The conditional logistic regression model for the estimates of anti-platelet therapy for overall dementia.**

**Table S3.1 The model in the main analysis.**

| <b>Predictors</b>                | <b>Estimates</b> | <b>CI</b>   | <b>P</b>         |
|----------------------------------|------------------|-------------|------------------|
| <b>APT</b>                       | 0.15             | 0.05 – 0.45 | <b>0.001</b>     |
| <b>Age (years)</b>               | 0.96             | 0.79 – 1.18 | 0.708            |
| <b>Asymptomatic at diagnosis</b> | 0.39             | 0.14 – 1.06 | 0.065            |
| <b>History of CHD</b>            | 2.17             | 0.90 – 5.21 | 0.084            |
| <b>Carotid plaque</b>            | 2.54             | 1.20 – 5.41 | <b>0.015</b>     |
| <b>AHT</b>                       | 0.41             | 0.14 – 1.20 | 0.102            |
| <b>Hypertension</b>              | 1.25             | 0.41 – 3.78 | 0.695            |
| <b>diabetes</b>                  | 1.32             | 0.64 – 2.75 | 0.451            |
| <b>Statin use</b>                | 3.28             | 1.38 – 7.82 | <b>0.007</b>     |
| <b>cSVD burden score</b>         | 1.83             | 1.38 – 2.42 | <b>&lt;0.001</b> |

Abbreviations: CI, confidence interval; APT, anti-platelet therapy; CHD, coronary heart disease; AHT, anti-hypertension therapy; cSVD, cerebral small vessel disease.

**Table S3.2 The model in the sensitivity analysis.**

| <b>Predictors</b>                 | <b>Estimates</b> | <b>CI</b>    | <b>p</b>         |
|-----------------------------------|------------------|--------------|------------------|
| <b>APT</b>                        | 0.14             | 0.04 – 0.45  | <b>0.001</b>     |
| <b>Age (years)</b>                | 0.95             | 0.77 – 1.18  | 0.659            |
| <b>Asymptomatic at diagnosis</b>  | 0.34             | 0.11 – 1.02  | 0.054            |
| <b>History of CHD</b>             | 1.76             | 0.67 – 4.61  | 0.248            |
| <b>Carotid plaque</b>             | 2.76             | 1.19 – 6.39  | <b>0.018</b>     |
| <b>AHT</b>                        | 0.36             | 0.11 – 1.17  | 0.089            |
| <b>Hypertension</b>               | 1.58             | 0.47 – 5.24  | 0.457            |
| <b>diabetes</b>                   | 1.02             | 0.45 – 2.30  | 0.968            |
| <b>Statin use</b>                 | 3.78             | 1.42 – 10.02 | <b>0.008</b>     |
| <b>Lacune <math>\geq 1</math></b> | 1.71             | 0.77 – 3.79  | 0.188            |
| <b>Moderate-to-severe WMH</b>     | 0.99             | 0.43 – 2.29  | 0.989            |
| <b>EPVs <math>\geq 10</math></b>  | 2.16             | 0.73 – 6.42  | 0.164            |
| <b>Brain atrophy</b>              | 9.97             | 3.25 – 30.55 | <b>&lt;0.001</b> |

Abbreviations: CI, confidence interval; APT, anti-platelet therapy; CHD, coronary heart disease; AHT, anti-hypertension therapy; WMH, whiter matter hyperintensities; EPVs, enlarged perivascular spaces.

**Supplementary Appendix S4: The conditional logistic regression model for the estimates of clopidogrel use for overall dementia.**

**Table S4.1 The model in the main analysis.**

| <b>Predictors</b>                | <b>Estimates</b> | <b>CI</b>   | <b>P</b>         |
|----------------------------------|------------------|-------------|------------------|
| <b>Clopidogrel use</b>           | 0.30             | 0.14 – 0.62 | <b>0.001</b>     |
| <b>Age (years)</b>               | 1.02             | 0.84 – 1.24 | 0.823            |
| <b>Asymptomatic at diagnosis</b> | 0.50             | 0.20 – 1.25 | 0.140            |
| <b>History of CHD</b>            | 2.19             | 0.91 – 5.30 | 0.081            |
| <b>Carotid plaque</b>            | 2.37             | 1.14 – 4.93 | <b>0.021</b>     |
| <b>AHT</b>                       | 0.36             | 0.12 – 1.08 | 0.069            |
| <b>Hypertension</b>              | 1.44             | 0.47 – 4.39 | 0.519            |
| <b>diabetes</b>                  | 1.24             | 0.61 – 2.54 | 0.551            |
| <b>Statin use</b>                | 2.47             | 1.13 – 5.40 | <b>0.023</b>     |
| <b>cSVD burden score</b>         | 1.79             | 1.35 – 2.38 | <b>&lt;0.001</b> |

Abbreviations: CI, confidence interval; APT, anti-platelet therapy; CHD, coronary heart disease; AHT, anti-hypertension therapy; cSVD, cerebral small vessel disease.

**Table S4.2 The model in the sensitivity analysis.**

| <b>Predictors</b>                 | <b>Estimates</b> | <b>CI</b>    | <b>p</b>         |
|-----------------------------------|------------------|--------------|------------------|
| <b>Clopidogrel use</b>            | 0.27             | 0.12 – 0.61  | <b>0.002</b>     |
| <b>Age (years)</b>                | 1.03             | 0.83 – 1.29  | 0.760            |
| <b>Asymptomatic at diagnosis</b>  | 0.41             | 0.14 – 1.16  | 0.091            |
| <b>History of CHD</b>             | 1.93             | 0.73 – 5.06  | 0.183            |
| <b>Carotid plaque</b>             | 2.49             | 1.10 – 5.66  | <b>0.029</b>     |
| <b>AHT</b>                        | 0.28             | 0.08 – 0.93  | <b>0.038</b>     |
| <b>Hypertension</b>               | 1.92             | 0.56 – 6.57  | 0.297            |
| <b>diabetes</b>                   | 0.92             | 0.41 – 2.08  | 0.838            |
| <b>Statin use</b>                 | 3.16             | 1.26 – 7.92  | <b>0.014</b>     |
| <b>Lacune <math>\geq 1</math></b> | 1.72             | 0.79 – 3.74  | 0.172            |
| <b>Moderate-to-severe WMH</b>     | 0.95             | 0.42 – 2.18  | 0.905            |
| <b>EPVs <math>\geq 10</math></b>  | 2.64             | 0.89 – 7.86  | 0.082            |
| <b>Brain atrophy</b>              | 9.93             | 3.25 – 30.34 | <b>&lt;0.001</b> |

Abbreviations: CI, confidence interval; APT, anti-platelet therapy; CHD, coronary heart disease; AHT, anti-hypertension therapy; WMH, whiter matter hyperintensities; EPVs, enlarged perivascular spaces.



### Supplementary Appendix S5: CSVD burden distribution between groups.

All eligible subjects were scored on cSVD burden based on four radiographic biomarkers: presence of lacunes (one point if present), presence of brain atrophy (one point if presence), presence of medium WMH (one point if present) or severe WMH (two points if presence) and presence of EPVs (one point if BGEPVs  $\geq 10$ ) (range 0-5).

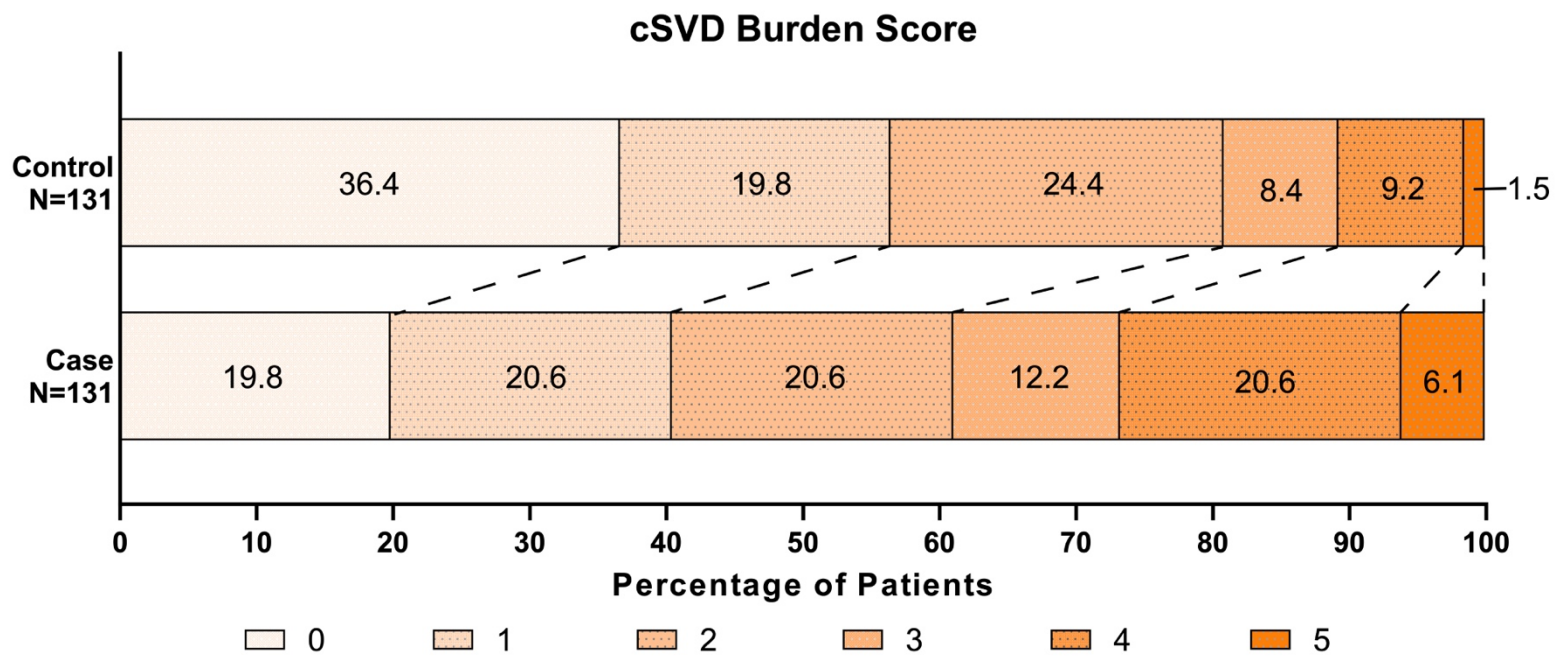

**Supplementary Appendix S6: The multivariable conditional logistic regression analyses on the association between APT and subtypes of dementia.**

The models adjusted for the same covariates as in the main analysis.

\* The actual CI was (0.004-2.990).

£ The CIs were (0, +∞).

|                             | OR (95% CI)        | P values |
|-----------------------------|--------------------|----------|
| <b>Vascular dementia</b>    |                    |          |
| APT                         | 0.11 (0.00-2.99) * | 0.193    |
| Clopidogrel                 | 0.64 (0.10-4.14)   | 0.637    |
| Aspirin                     | 0.27 (0.03-2.15)   | 0.215    |
| Cilostazol                  | 2.68 (0.23-31.72)  | 0.434    |
| <b>Alzheimer's diseases</b> |                    |          |
| APT                         | NA <sup>£</sup>    | 0.998    |
| Clopidogrel                 | 0.19 (0.05-0.77)   | 0.020    |
| Aspirin                     | 0.86 (0.25-3.04)   | 0.820    |
| Cilostazol                  | NA <sup>£</sup>    | 0.999    |
| <b>Unspecified dementia</b> |                    |          |
| APT                         | 0.27 (0.03-2.26)   | 0.227    |
| Clopidogrel                 | 0.14 (0.02-0.85)   | 0.032    |
| Aspirin                     | 4.61 (0.62-34.46)  | 0.137    |
| Cilostazol                  | NA <sup>£</sup>    | 0.999    |

**Supplementary Appendix S7: The detailed acquisition parameters of MRI sequences.**

MRI scanning was performed on 1.5 Tesla Siemens/Philips Magnetom Trio Tim scanner, using a 32-channel head coil, at the Sun Yat-sen Memorial Hospital, Sun Yat-sen University. FLAIR imaging was T2-weighted.

| <b>Sequence</b>        | <b>T1WI</b> | <b>T2WI</b> |
|------------------------|-------------|-------------|
| TR (ms)                | 1090        | 4500        |
| TE (ms)                | 8.4         | 118         |
| Flip angle             | 150         | 150         |
| FOV (mm)               | 230×208     | 230×208     |
| Voxel size (mm)        | 0.4×0.4×5   | 0.2×0.2×5   |
| Slice thickness (mm)   | 5           | 5           |
| Overlapping gap (mm)   | 1           | 1           |
| Acquisition time (min) | 2'22"       | 2'58"       |

MRI, magnetic resonance imaging; T1-weighted imaging (T1WI), T2-weighted imaging (T2WI); TR, repetition time; TE, echo time; FOV, field of view; VIBE, volume interpolated body examination; FS, fat-suppression.
